# Supplementary material for: Molecular profiling of prostate cancer derived exosomes may reveal a predictive signature for response to docetaxel
Source: PubMed Central journal article supplement (PMC4673300; doi:10.18632/oncotarget.3226), 2015-03-12
Supplement: oncotarget-06-21740-s001.pdf [file oncotarget-06-21740-s001.pdf]

SUPPLEMENTARY FIGURES AND TABLE

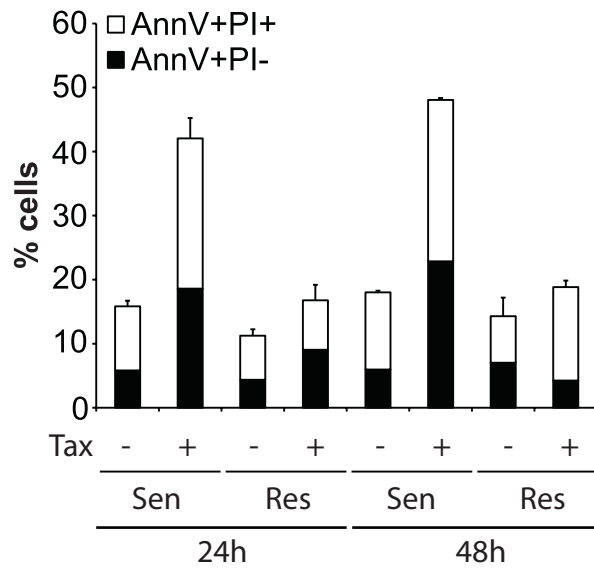

**Supplementary Figure 1: DU145 Tax-Res cells do not undergo cell death in response to docetaxel.** Quantitative analyses of Annexin V/PI positive DU145 cells treated with 50 ng/ml docetaxel for 24 and 48 hours (means  $\pm$  SD,  $n = 3$ ).

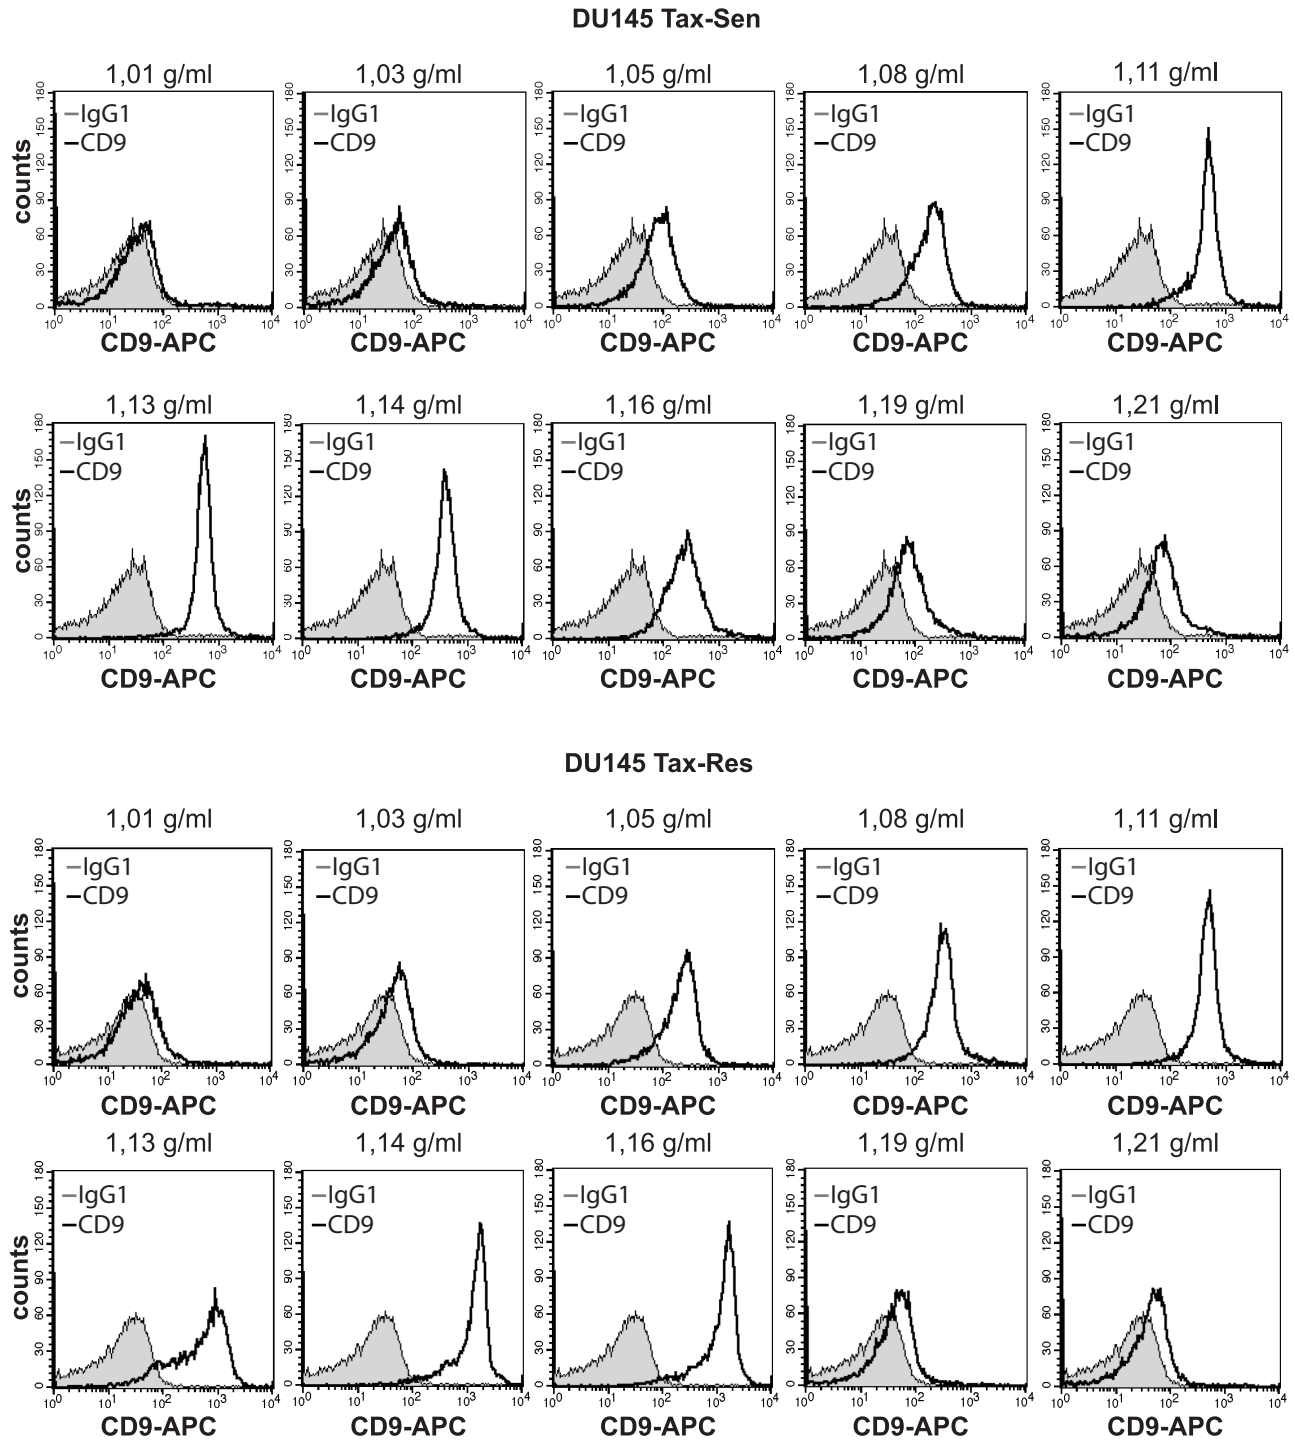

**Supplementary Figure 2: Flow cytometric analysis of the sucrose gradient fractions for the DU145 Tax-Sen and Tax-Res exosomes.** Flow cytometric analysis of CD9-APC fluorescence intensity in the individual fractions of the sucrose gradient.

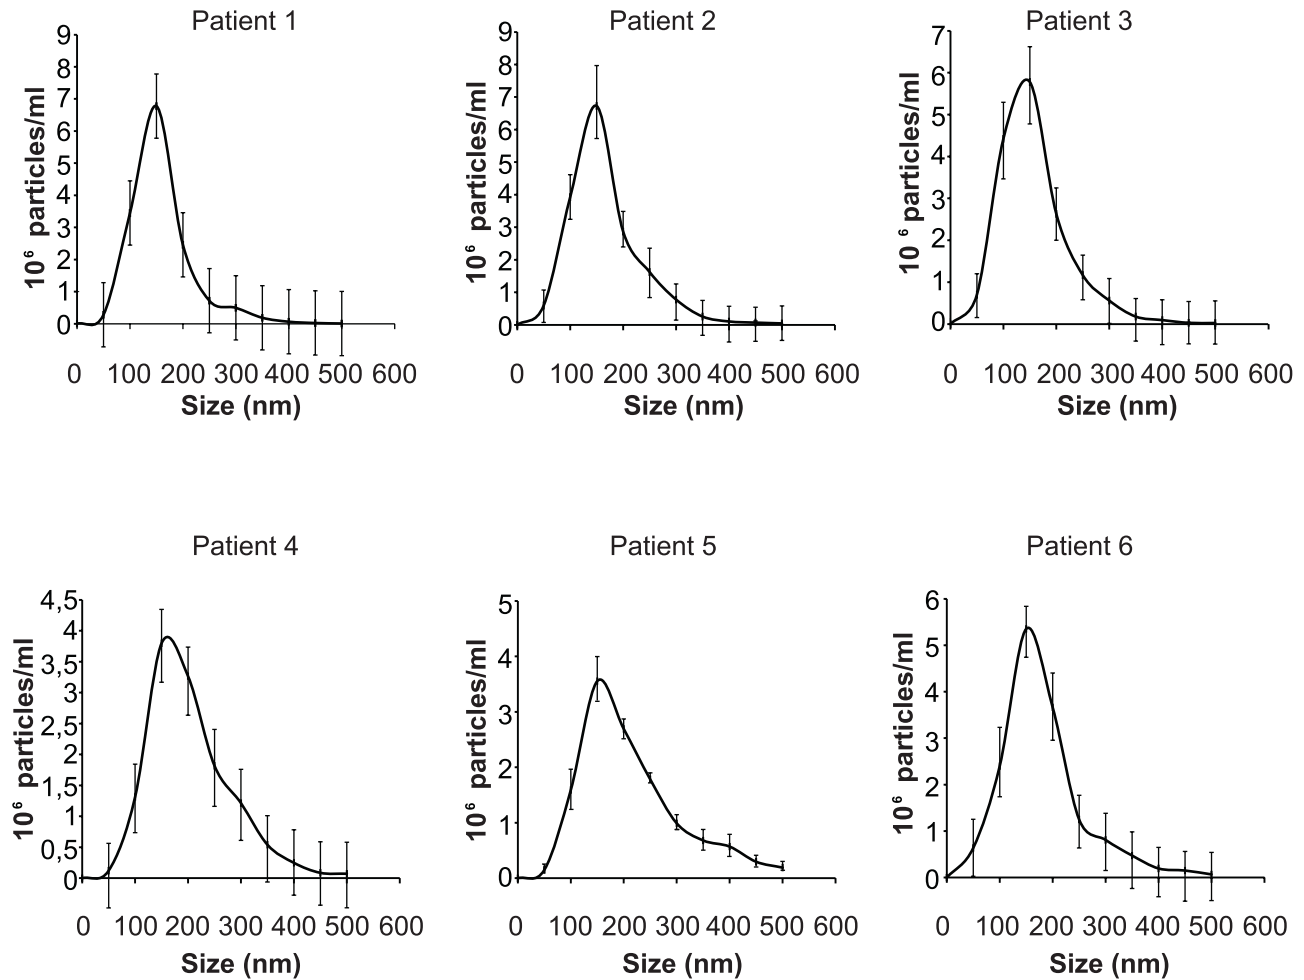

**Supplementary Figure 3: Nanoparticle tracking analysis of the CRPC patient samples.** Nanoparticle tracking analysis of the relative concentration and size of EVs isolated from the serum of 3 docetaxel resistant and 3 docetaxel sensitive CRPC patients, as described in the materials and methods. The size distribution and relative concentration were calculated by the Nanosight software (means  $\pm$  SD,  $n = 3$ ).

**Supplementary Table 1: List of proteins identified by LC MS/MS proteomics analysis of DU145 Tax-Sen and DU145 Tax-Res derived exosomes**
